## Managing bifurcations: are two stents better than one?

P. Araujo Leite Medeiros, C. Braga, I. Campos, C. Oliveira, C. Pires, R. Flores, F. Mane, R. Silva, J. Costa, J. Marques, C. Braga

*Hospital de Braga, Braga, Portugal*

**Funding Acknowledgement:** Type of funding sources: None.

**Introduction:** Bifurcation percutaneous coronary intervention (PCI) is associated with a higher degree of complexity when compared with non-bifurcation procedures. Although 1-stent PCI remains the standard approach for most bifurcation lesions, data is constantly being published on 2-stent PCI.

**Aim:** To evaluate and compare the characteristics and outcomes of patients that underwent bifurcation PCI with one or two stents.

**Methods:** Single center, retrospective observational study including all patients who underwent bifurcation PCI between January 2015-December 2018. We defined two groups: 1-stent PCI group (1s-PCI) and 2-stent PCI group (2s-PCI). The 2s-PCI group included PCI patients with all the different techniques used in our center: provisional stenting with 2 stents, Culotte, crushing stent and DK Crush.

**Results:** 1s-PCI group included 376 individuals and 2s-PCI group included 26. Overall baseline clinical characteristics were balanced between groups. There was no statistically significant difference in age (mean 64 vs 66;  $p=0.388$ ), gender (79% vs 85% males;  $p=0.622$ ) and comorbidities (hypertension, diabetes mellitus, hypercholesterolemia, chronic kidney dis-

ease, smoking and previous history of coronary artery disease). Also, there was no difference in clinical status (NSTEMI 36% vs 38%; stable disease 32% vs 42%; STEMI 28% vs 19%; unstable angina 5% vs 0%;  $p=0.419$ ). Coronary angiography and lesion distribution were similar in both groups ( $p=0.367$ ). However, radiation dose (median 90.5 [IQR=79] vs 156 [IQR=84] mGy cm<sup>2</sup>;  $p<0.001$ ) and contrast volume (median 150 [IQR=100] vs 156 [IQR=83] ml;  $p<0.001$ ) were significantly higher in 2s-PCI group. At 12-month follow-up, mortality rate was higher in 1s-PCI group, but without statistical significance (8% vs 4%;  $p=0.71$ ); the same is true for acute myocardial infarction at 12 months (3% vs 0%;  $p=0.368$ ). Target-lesion failure was only reported in 4 patients in the 1s-PCI group. Survival tests showed no significant difference between groups ( $\chi^2(1,n=402)=0.634$ ;  $p=0.426$ ).

**Conclusion:** Individuals that underwent 1s-PCI were overall similar to those who underwent 2s-PCI. Predictably, deploying more than 1 stent required more contrast volume and implied a higher radiation dose. We should note that our studied is greatly limited by the 2s-PCI group size, which may justify the lack of difference in the evaluated outcomes.
